# Supplementary material for: Metagenomic Analysis of the Airborne Environment in Urban Spaces
Source: PubMed Central journal article supplement (PMC4312561; doi:10.1007/s00248-014-0517-z), 2014-10-29

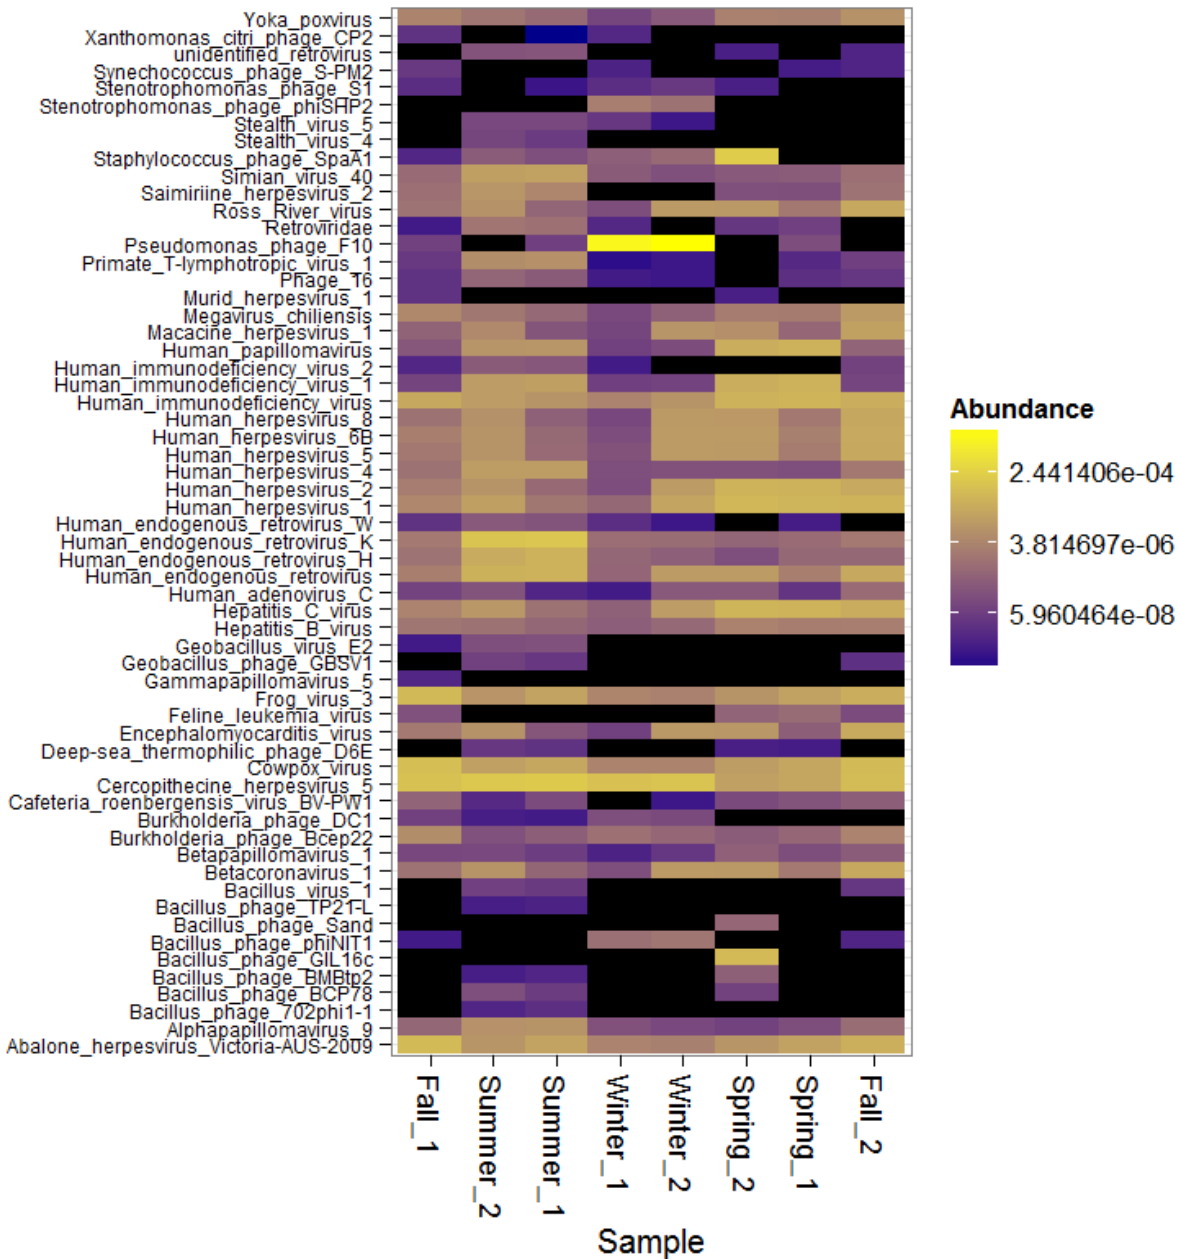

Supplement: 248_2014_517_MOESM1_ESM.pdf [file 248_2014_517_MOESM1_ESM.pdf]
